# Supplementary material for: Fe-doped α-MnO2/rGO cathode material for zinc ion batteries with long lifespan and high areal capacity
Source: Royal Society of Chemistry journal article supplement (doi:10.1039/d3ta07587g), 2024-01-01
Supplement: d3ta07587g1.pdf [file d3ta07587g1.pdf]

*Supporting information*

**Fe doped  $\alpha$ -MnO<sub>2</sub>/rGO cathode material for zinc ion  
battery with long lifespan and High areal capacity**

Qiang Zhang,<sup>a</sup> Hefei Fan,<sup>a</sup> Qianfeng Liu,<sup>a</sup> Yangga Wu<sup>b</sup> and Erdong Wang\*,<sup>a</sup>

<sup>a</sup> Division of Fuel Cell & Battery, Dalian National Laboratory for Clean Energy,

Dalian Institute of Chemical Physics, Chinese Academy of Sciences. Dalian 116023,

China. E-mail: [edwang@dicp.ac.cn](mailto:edwang@dicp.ac.cn).

<sup>b</sup> Energy Administration of Inner Mongolia Autonomous Region

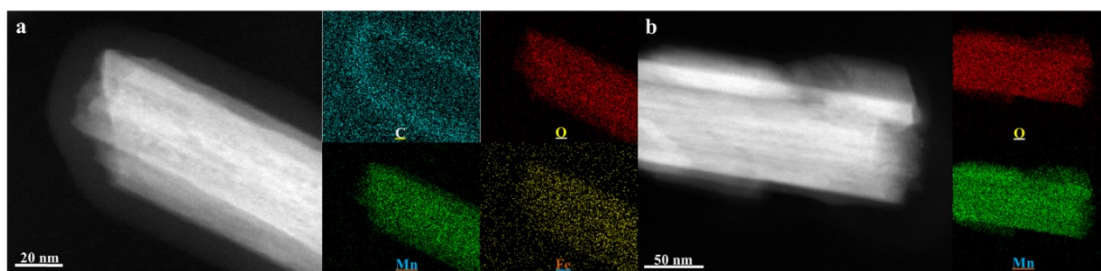

**Fig. S1** The HRTEM images of Fe doped  $\alpha$ -MnO<sub>2</sub>/rGO (a) and  $\alpha$ -MnO<sub>2</sub> (b) with their EDS images.

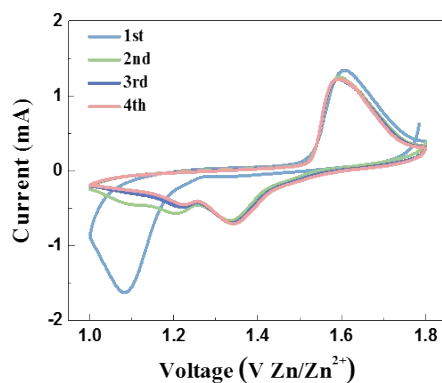

**Fig. S2** CV curves of  $\alpha$ -MnO<sub>2</sub>.

**Table S1** The list of performance comparison of MnO<sub>2</sub>-based cathode materials for ZIBs.

| sample                                                     | Current density (A g <sup>-1</sup> ) | Specific capacity (mAh g <sup>-1</sup> )                     | Ref.                                                   |
|------------------------------------------------------------|--------------------------------------|--------------------------------------------------------------|--------------------------------------------------------|
| $\beta$ -MnO <sub>2</sub> @GO                              | 1.2                                  | 129.6 (after 2000 cycles)                                    | 14, Nano-Micro Lett. (2021) 13:173                     |
| MnO <sub>2</sub> @N                                        | 0.5<br>5                             | 160 (after 500 cycles)<br>102 (after 1000 cycles)            | 17, J. Energy Chem., 64 (2022) 23–32                   |
| A-MnO <sub>2</sub>                                         | 3                                    | 100 (after 600 cycles)                                       | 47, Chem. Eng. J., 441 (2022) 136008                   |
| S-MnO <sub>2</sub>                                         | 3                                    | 150 (after 1000 cycles)                                      | 48, Energy storage mater., 47 (2022) 424-433           |
| $\alpha$ -MnO <sub>2</sub>                                 | 0.5                                  | 130 (after 100 cycles)                                       | 49, Small, 2020, 16, 1905842                           |
| CuMO                                                       | 5                                    | 100 (after 700 cycles)                                       | 50, Chem. Eng. J., 433 (2022) 133687                   |
| Mo-MnO <sub>2</sub>                                        | 1                                    | 159 (after 1000 cycles)                                      | 51, ACS Appl. Mater. Interfaces, 15 (2023) 859-869     |
| $\delta$ -MnO <sub>2</sub>                                 | 1                                    | 114 (after 1000 cycles)                                      | 52, ACS Appl. Mater. Interfaces, 2022, 14, 21159–21172 |
| $\alpha$ -MnO <sub>2</sub> /Mn <sub>2</sub> O <sub>3</sub> | 3                                    | 183 (after 1000 cycles)                                      | 53, J. Energy Chem., 54 (2021) 475–481                 |
| MnO <sub>2</sub> /GO                                       | 2                                    | 160 (after 2000 cycles)                                      | 54, Adv. Funct. Mater., 2021, 31, 2007397              |
| N-MnO <sub>2-x</sub>                                       | 1                                    | 170 (after 1000 cycles)                                      | 55, Small 2019, 15, 1905452                            |
| This Work                                                  | 1<br>10<br>15                        | 172 (after 2000 cycles)<br>72.1 (after 10000 cycles)<br>62.5 | --                                                     |

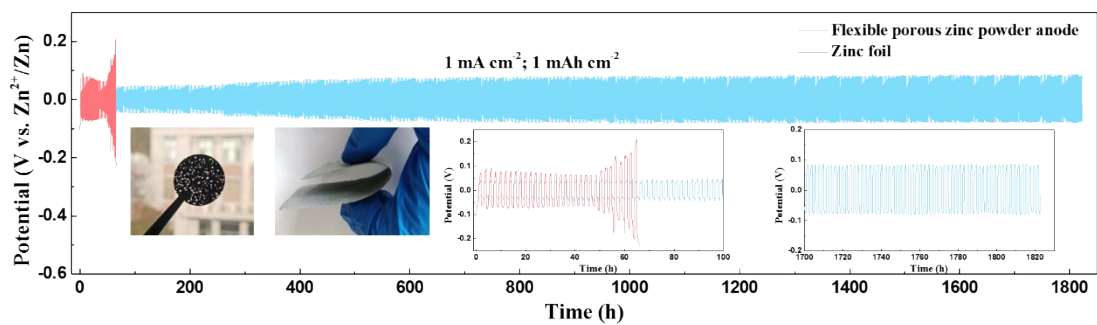

**Fig. S3** The long-term cycle performances and images (embedded on the left) of the flexible porous zinc powder anode and bare Zn foil anode tested by Zn||Zn symmetric cell at  $1 \text{ mA cm}^{-2}$  and  $1 \text{ mAh cm}^{-2}$ .

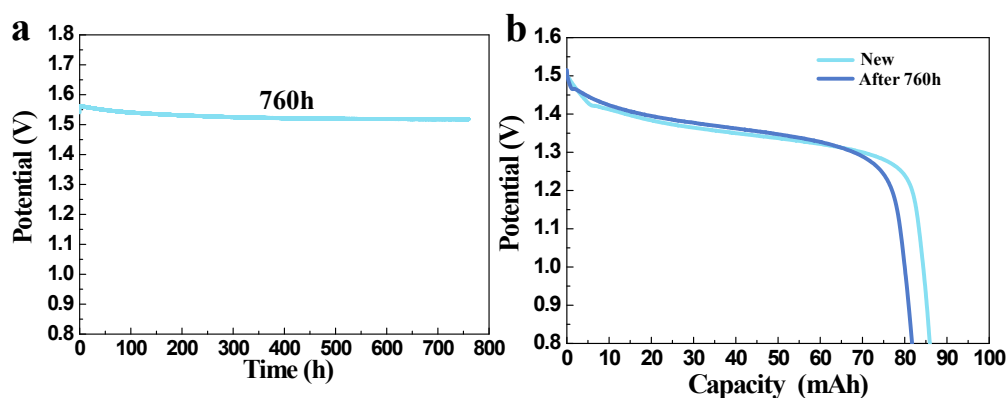

**Fig. S4** The curves of (a) open circuit voltage (OCV) and (b) discharge performance after storage for 760 h as well as without storage for the assembled pouch battery with Fe doped  $\alpha\text{-MnO}_2/\text{rGO}$  and flexible porous zinc powder anode as cathode and anode (theoretical capacity 100 mAh).
